# Supplementary material for: Effectiveness of a Structured Educational Training Program on Antimicrobial Resistance Among Community Health Workers in India
Source: Research Square preprint supplement (doi:10.21203/rs.3.rs-7315492/v1), 2025-08-26
Supplement: Supplementary file 1 [file ad4afbfd7f23eceb4b249dd7.docx]

**Supplementary Table 1: ASHAs' knowledge towards antibiotic use and AMR before and after training (n=103)**

| **Question** | | **Before training** | | **After training** | | **P- value** |
| --- | --- | --- | --- | --- | --- | --- |
| **n** | **(%)** | **n** | **(%)** |
| K1: Antibiotics are useful for  killing germs. | Strongly agree | 27 | 26.2% | 0 | 0.0% | **0.012** |
| Agree | 29 | 28.1% | 2 | 1.9% |
| Neutral | 35 | 34.0% | 0 | 0.0% |
| Disagree | 12 | 11.7% | 49 | 47.6% |
| Strongly disagree | 0 | 0.0% | 52 | 50.5% |
| K2: Amoxicillin, Azithromycin,  and Ciprofloxacin are  antibiotics. | Strongly agree | 13 | 12.6% | 0 | 0.0% | **0.01** |
| Agree | 23 | 22.3% | 0 | 0.0% |
| Neutral | 33 | 32.1% | 0 | 0.0% |
| Disagree | 34 | 33.0% | 45 | 43.7% |
| Strongly disagree | 0 | 0.0% | 58 | 56.3% |
| K3: Common cold and cough  treatment requires antibiotic  medicines. | Strongly agree | 27 | 26.2% | 0 | 0.0% | **0.002** |
| Agree | 43 | 41.7% | 15 | 14.6% |
| Neutral | 20 | 19.4% | 2 | 1.9% |
| Disagree | 12 | 11.7% | 40 | 38.8% |
| Strongly disagree | 1 | 1.0% | 46 | 44.7% |
| K4: Antibiotic resistance is one of the biggest threats to global health. | Strongly agree | 19 | 18.4% | 0 | 0.0% | **<0.001** |
| Agree | 39 | 37.9% | 1 | 1.0% |
| Neutral | 30 | 29.1% | 6 | 5.8% |
| Disagree | 15 | 14.6% | 46 | 44.7% |
| Strongly disagree | 0 | 0.0% | 50 | 48.5% |
| K5: The inability of antibiotics  to kill bacteria is known as  antimicrobial resistance. | Strongly agree | 9 | 8.7% | 0 | 0.0% | 0.055 |
| Agree | 31 | 30.1% | 2 | 1.9% |
| Neutral | 39 | 37.9% | 3 | 2.9% |
| Disagree | 23 | 22.3% | 67 | 65.1% |
| Strongly disagree | 1 | 1.0% | 31 | 30.1% |
| K6: Antibiotics can be obtained  from relatives or friends, without consulting a doctor. | Strongly agree | 28 | 27.2% | 2 | 1.9% | **0.001** |
| Agree | 45 | 43.7% | 5 | 4.9% |
| Neutral | 23 | 22.3% | 2 | 1.9% |
| Disagree | 7 | 6.8% | 57 | 55.4% |
| Strongly disagree | 0 | 0.0% | 37 | 35.9% |
| K7: Antibiotics can be stopped if the patient's symptoms are reduced | Strongly agree | 27 | 26.2% | 9 | 8.7% | **<0.001** |
| Agree | 64 | 62.1% | 12 | 11.7% |
| Neutral | 10 | 9.7% | 5 | 4.9% |
| Disagree | 2 | 1.9% | 30 | 29.1% |
| Strongly disagree | 0 | 0.0% | 47 | 45.6% |
| K8: Non-adherence to antibiotic treatment by patients can be a contributing factor to antibiotic resistance. | Strongly agree | 20 | 19.4% | 0 | 0.0% | **0.035** |
| Agree | 24 | 23.3% | 2 | 1.9% |
| Neutral | 47 | 45.6% | 1 | 1.0% |
| Disagree | 12 | 11.7% | 66 | 64.1% |
| Strongly disagree | 0 | 0.0% | 34 | 33.0% |
| K9: Improper usage of antibiotics could lead to antimicrobial resistance. | Strongly agree | 26 | 25.2% | 8 | 7.8% | **0.001** |
| Agree | 28 | 27.2% | 3 | 2.9% |
| Neutral | 34 | 33.0% | 1 | 1.0% |
| Disagree | 15 | 14.6% | 54 | 52.4% |
| Strongly disagree | 0 | 0.0% | 37 | 35.9% |
| K10: It is possible to prevent  antibiotic resistance by following the infection prevention and control measures and the proper use of antibiotics in the community | Strongly agree | 13 | 12.6% | 2 | 1.9% | **0.001** |
| Agree | 26 | 25.2% | 0 | 0.0% |
| Neutral | 36 | 35.0% | 4 | 3.9% |
| Disagree | 28 | 27.2% | 43 | 41.7% |
| Strongly disagree | 0 | 0.0% | 54 | 52.4% |

**Supplementary Table 2 : ASHAs' attitude towards antibiotic use and AMR before and after training (n=103)**

| **Question** | | **Before training** | | **After training** | | **P-value** |
| --- | --- | --- | --- | --- | --- | --- |
| n | (%) | n | (%) |
| A1: ASHAs can suggest antibiotics to a family  member when they are sick without a doctor's opinion. | Strongly agree | 3 | 2.9% | 0 | 0.0% | 0.235 |
| Agree | 8 | 7.8% | 10 | 9.7% |
| Neutral | 0 | 0.0% | 6 | 5.9% |
| Disagree | 61 | 59.2% | 37 | 35.9% |
| Strongly disagree | 31 | 30.1% | 50 | 48.5% |
| A2: ASHAs can confidently name common antibiotics used in their primary health centre | Strongly agree | 0 | 0.0% | 27 | 26.2% | **<0.001** |
| Agree | 6 | 5.8% | 37 | 35.9% |
| Neutral | 1 | 1.0% | 34 | 33% |
| Disagree | 74 | 71.8% | 5 | 4.9% |
| Strongly disagree | 22 | 21.4% | 0 | 0.0% |
| A3: ASHAs can provide guidance to patients regarding the importance of completing the course of prescribed antibiotics. | Strongly agree | 0 | 0.0% | 44 | 42.7% | **<0.001** |
| Agree | 0 | 0.0% | 19 | 18.4% |
| Neutral | 0 | 0.0% | 8 | 7.8% |
| Disagree | 44 | 42.7% | 32 | 31.1% |
| Strongly disagree | 59 | 57.3% | 0 | 0% |
| A4: ASHAs should be provided with adequate training on antimicrobial use. | Strongly agree | 0 | 0% | 3 | 2.9% | **<0.001** |
| Agree | 0 | 0% | 16 | 15.5% |
| Neutral | 0 | 0% | 22 | 21.4% |
| Disagree | 44 | 42.7% | 33 | 32.0% |
| Strongly disagree | 59 | 57.3% | 29 | 28.2% |
| A5: ASHAs have a responsibility to take a prominent role in the prevention of antibiotic resistance in India. | Strongly agree | 0 | 0% | 16 | 15.6% | **<0.001** |
| Agree | 1 | 1.0% | 26 | 25.2% |
| Neutral | 0 | 0% | 35 | 34.0% |
| Disagree | 64 | 62.1% | 24 | 23.3% |
| Strongly disagree | 38 | 36.9% | 2 | 1.9% |

**Supplementary Table 3: ASHAs' practice towards antibiotic use and AMR before and after training (n=103)**

| **Question** | | **Before training** | | **After training** | | **P-value** |
| --- | --- | --- | --- | --- | --- | --- |
| **n** | **(%)** | **n** | **(%)** |
| P1: Do you provide the community with simple instructions about the proper use and side effects of antibiotics? | Never | 86 | 83.5% | 0 | 0.0% | **<0.001** |
| Sometimes | 17 | 16.5% | 32 | 31.1% |
| Always | 0 | 0.0% | 71 | 68.9% |
| P2: Do you explain to people about the proper storage and disposal of antibiotics? | Never | 103 | 100.0% | 0 | 0.0% | **<0.001** |
| Sometimes | 0 | 0.0% | 30 | 29.1% |
| Always | 0 | 0.0% | 73 | 70.9% |
| P3: Do you follow up with patients to check their adherence to antibiotic medicines? | Never | 89 | 86.4% | 11 | 10.7% | **<0.001** |
| Sometimes | 14 | 13.6% | 73 | 70.9% |
| Always | 0 | 0.0% | 19 | 18.4% |
| P4: Do you explain to people what antibiotic resistance is and what it means? | Never | 103 | 100.0% | 1 | 1.0% | **<0.001** |
| Sometimes | 0 | 0.0% | 38 | 36.9% |
| Always | 0 | 0.0% | 64 | 62.1% |

**Supplementary Table 4: Demographic details of supervisors (n=30)**

| **Questions** | **Category** | **Frequency**  **(n=30)** | **Percentage** |
| --- | --- | --- | --- |
| Age | 20-30 | 12 | 40 |
| 31-40 | 14 | 46.7 |
| 41-50 | 4 | 13.3 |
| Gender | Male | 2 | 6.7 |
| Female | 28 | 93.3 |
| Experience | 1 to 5 | 12 | 40 |
| 6 to 10 | 14 | 46.6 |
| 11 to 15 | 2 | 6.7 |
| 16 to 20 | 2 | 6.7 |
| Educational qualification | BSc Nursing | 14 | 46.7 |
| GNM nursing | 16 | 53.3 |
| Designation | CHO | 12 | 40 |
| PHCO | 18 | 60 |

**Supplementary Table 5: Supervisor Feedback on ASHAs’ Community Education Sessions on AMR and Antibiotic Use (n=30)**

| **Questions** | **Category** | **Frequency**  **(n=30)** | **Percentage** |
| --- | --- | --- | --- |
| Did the ASHA use the correct IEC materials (e.g; poster, infographic)? | Yes | 24 | 80 % |
| No | 6 | 20% |
| Did the ASHA deliver accurate messages about antibiotic use and AMR? | Yes | 21 | 70% |
| No | 9 | 30% |
| How would you rate the ASHA's communication skills? | Excellent | 21 | 70% |
| Good | 4 | 13.3% |
| Needs improvement | 5 | 16.7% |
| Was the session delivered clearly and  in the local language? | Yes | 30 | 100% |
| No | 0 | 0% |
| Was the community attentive and engaged during the session? | Yes | 21 | 70 |
| No | 9 | 30% |
| Was the session completed within the appropriate time (10–15 min)? | Yes | 23 | 76.7% |
| No | 7 | 23.3% |
